# Supplementary material
Source: Royal Society of Chemistry journal article supplement (doi:10.1039/d6ay00278a)
Supplement: d6ay00278a1.pdf [file d6ay00278a1.pdf]

## Supplementary information

Rapid and convenient electrochemical hemoglobin detection in mouse feces employing a DNA aptamer to evaluate the severity of colitis in a mouse model

Mizuki Nakashima<sup>1‡</sup>, Daimei Miura<sup>1, 2‡</sup>, Erika Komiya<sup>1</sup>, Nanami Watanabe<sup>3</sup>, Kaori Tsukakoshi<sup>4</sup>, Tsutomu Omatsu<sup>5</sup>, Wakako Tsugawa<sup>1</sup>, Koji Sode<sup>6</sup>, Kazunori Ikebukuro<sup>1</sup>, Toshinori Yoshida<sup>3</sup>, Ryutaro Asano<sup>1\*</sup>

<sup>1</sup>Department of Biotechnology and Life Science, Graduate School of Engineering, Tokyo University of Agriculture and Technology, 2-24-16 Naka-cho, Koganei, 184-8588, Tokyo, Japan

<sup>2</sup>Institute of Global Innovation Research, Tokyo University of Agriculture and Technology, 3-8-1 Harumi-cho, Fuchu, 183-8538, Tokyo, Japan

<sup>3</sup>Department of Veterinary Medicine, Tokyo University of Agriculture and Technology, 3-5-8 Saiwai-cho, Fuchu, Tokyo 183-8509, Japan

<sup>4</sup>Department of Chemistry, Faculty of Science Division I, Tokyo University of Science, 1-3 Kagurazaka, Shinjuku, Tokyo 162-8601, Japan

<sup>5</sup>Center for Infectious Disease Epidemiology and Prevention Research, Faculty of Agriculture, Tokyo University of Agriculture and Technology, 3-5-8 Saiwai-cho, Fuchu, Tokyo 183-8509, Japan

<sup>6</sup>Lampe Joint Department of Biomedical Engineering, University of North Carolina at Chapel Hill and North Carolina State University, Chapel Hill, NC 27599, USA

\*Corresponding author

Ryutaro Asano; E-mail: ryutaroa@cc.tuat.ac.jp

## Materials and methods

### Recombinant production of proteins

All the proteins including SpyCatcher (SC)-fused glucose dehydrogenase (GDH), SpyTag (ST)-fused UdgX, and SC-fused glucose oxidase (GOx) were recombinantly produced using *Escherichia coli* (*E. coli*) BL21(DE3) strain as an expression host. For SC-GDH-SC, the transformants were grown in the autoinduction Luria-Bertani (LB) medium containing 0.05% (w/v) glucose, 0.5% (v/v) glycerol, 0.2% (w/v)  $\beta$ -lactose, 25 mM  $(\text{NH}_4)_2\text{SO}_4$ , 50 mM  $\text{Na}_2\text{HPO}_4$ , 50 mM  $\text{KH}_2\text{PO}_4$ , 1 mM  $\text{MgSO}_4$ , and 50  $\mu\text{g}/\text{mL}$  kanamycin at 37 °C and 170 rpm for 24 h. Cells were disrupted using a French press (Ohtake Works, Tokyo, Japan) and the intracellular soluble fraction was obtained by a centrifuge at  $13,000 \times g$  for 20 min at 4 °C. The sample was purified using NGC Quest 10 Plus (Bio-Rad, Inc., Hercules, CA, USA) and HisTrap HP column (Cytiva, Tokyo, Japan), and the purified sample was dialyzed against 20 mM potassium phosphate buffer (pH 6.5).

GOx-SC was prepared from the intracellular insoluble fraction of *E. coli* BL21(DE3) as previously described with some modifications.<sup>1</sup> The transformants were cultured in 100 mL LB medium at 37 °C. When the OD reached 0.6, isopropyl- $\beta$ -thiogalactopyranoside (IPTG) was added (0.5 mM) to induce protein expression, and the cells were cultured at 37 °C and 150 rpm for 24 h. The cells were collected via centrifugation at  $4800 \times g$  at 4 °C for 20 min and resuspended in 20 mM phosphate buffer (pH 7.0). Next, the refolded sample was concentrated using ultrafiltration with Amicon Ultra 30 K (30 kDa cutoff, Merck Millipore, Burlington, MA, USA) and purified using the NGC Quest 10 Plus (Bio-Rad) and HisTrap HP (Cytiva) and gel filtration chromatography using Superdex 200 Increase 10/300 GL (Cytiva).

UdgX-ST was prepared from the intracellular soluble fraction of *E. coli* BL21(DE3) LOBSTR strain as previously described.<sup>2</sup> Briefly, the transformants were cultured in the autoinduction LB medium containing 50  $\mu\text{g}/\text{mL}$  kanamycin, 0.01% (w/v)  $\text{FeCl}_3$  and twice the molar amount of citric acid at 28 °C and 170 rpm for 24 h. Cells were disrupted using a French press (Ohtake Works) and the intracellular soluble fraction was obtained by a centrifuge at  $13,000 \times g$  for 20 min at 4 °C. Then, the sample was purified using the NGC Quest 10 Plus (Bio-Rad) and HisTrap HP column (Cytiva). The purified sample was dialyzed against 50 mM Tris-HCl containing 500 mM NaCl and 10% (v/v) glycerol (pH 8.0).

The purity of all proteins was evaluated using sodium dodecyl sulfate polyacrylamide gel electrophoresis (SDS-PAGE). The concentrations of SC-GDH-SC

and GOx-SC were determined by measuring their absorbance at 280 nm, while the concentration of UdgX-ST was determined using the Bradford assay kit (Bio-Rad).

### **Fabrication of DNA aptamer-enzyme complexes**

DNA aptamer used in this study was synthesized by Eurofins Genomics (Tokyo, Japan). DNA aptamer-enzyme complexes were prepared by mixing of 10  $\mu$ M of UdgX-ST with 5  $\mu$ M of SC-GDH-SC or GOx-SC and incubation at 4 °C for 24 h, followed by mixing with 5  $\mu$ M UdgX recognition sequence-containing PEA3-01 in 10 mM sodium phosphate buffer containing 10 mM KCl (pH 6.0) and incubating at 4 °C for 18 h. To evaluate DNA aptamer-enzyme complexes formation, the reaction was terminated by addition of a buffer containing 125 mM Tris-HCl (pH 6.5), 20% (v/v) glycerol, 4% (w/v) sodium dodecyl sulfate, 3.1% (w/v) dithiothreitol, and 0.01% (w/v) bromophenol blue and by boiling at 95 °C for 10 min.

### **Dehydrogenase enzyme activity assay**

The dehydrogenase activities of SC-GDH-SC, GDH-UdgX, aptamer-GDH were evaluated using phenazine methosulfate (PMS) and 2,6-dichlorophenolindophenol (DCIP). Each 20  $\mu$ L of the samples was mixed with 160  $\mu$ L of reaction solution containing 20 mM potassium phosphate (pH 6.5), 6 mM PMS, and 0.6 mM DCIP. Then, 20  $\mu$ L of various concentrations of glucose was added. To calculate the kinetic parameters, the absorbance at 600 nm was monitored for 30 sec using a spectrometer (Shimadzu Corporation, Kyoto, Japan).

### **Evaluation of aptamer binding to mouse Hb**

Enzyme-linked Oligonucleotide Assay (ELONA) was performed to confirm the binding ability of aptamer. 100 nM human Hb (Sigma-Aldrich, St. Louis, MO, USA) or mouse Hb (CUSABIO, Inc., Wuhan, China) diluted in carbonate–bicarbonate buffer (Sigma-Aldrich) was immobilized in a 96-well plate (Thermo Fisher Scientific, Waltham, MA, USA) and incubated at 25 °C for 1 h. The wells were washed three times with wash buffer (50 mM Tris–HCl, 138 mM NaCl, 2.7 mM KCl, and 0.05% (v/v) Tween 20, pH 8.0) and blocked with wash buffer containing 2% (w/v) skim milk at 25 °C for 1 h. Various concentrations of fluorescein (FAM) -modified aptamer, aptamer-UdgX, aptamer-GDH were added, and the plate was incubated at 25 °C for 1 h. The plate was washed three times, and the fluorescence of FAM derived from aptamer was measured using a Varioskan Flash Microplate reader (Thermo Fisher Scientific).

### **Electrochemical mouse Hb detection in mouse feces**

Anti-mouse Hb IgG (2.8  $\mu$ g) was immobilized onto 40  $\mu$ g of Protein A/G-coated magnetic beads (Thermo Fisher Scientific) by incubating at 25 °C for 1 h, and the beads were washed with 100 mM potassium phosphate buffer (pH 6.5) containing 0.05% (v/v) Tween-20 three times to remove unreacted antibodies. Then, the beads were blocked by incubation with 100 mM potassium phosphate buffer (pH 6.5) containing 0.05% (v/v) Tween-20 and 1% (w/v) bovine serum albumin (BSA) under gentle shaking at 25 °C for 18 h, and each washing step was repeated three times. Next, 40  $\mu$ g of the anti-mouse Hb IgG-immobilized magnetic beads were mixed with 20  $\mu$ L of 600 nM aptamer-GDH or aptamer-GOx diluted with 100 mM phosphate buffer (pH 6.5) and 20  $\mu$ L of various concentrations of mouse Hb under shaking at 1,200 rpm at 25 °C for 15 min. Then, 35  $\mu$ L of 15 mM mPMS was mixed, and 20  $\mu$ L of the mixed solution was subsequently loaded onto a screen-printed carbon electrode (DEP-Chip EP-PP, BioDevice Technology Ltd., Ishikawa, Japan). Under the working electrode, a magnet was placed to accumulate the magnetic beads. Finally, chronoamperometry was performed by applying a potential of +150 mV vs. Ag/AgCl. After 2 min, 5  $\mu$ L of 500 mM glucose was spiked and the current change was monitored, and the current increase after the glucose addition was plotted. To prepare the mouse Hb sample in mouse feces, 4 mg of mouse feces were ultrasonicated in 1 mL of phosphate-buffered saline (PBS). The homogenate was centrifuged at  $3000 \times g$  for 5 min, and the supernatant was used as the mouse fecal solution after spiking mouse Hb.

### **Statistical analysis**

Data were presented as the mean  $\pm$  standard deviation (SD) unless otherwise stated. Statistical analysis for each experiment was described in figure legends. The numbers of technical and biological replicates for each result were described in figure legends. The significance of the results was analyzed by Student's T-test (two-tailed) and  $p < 0.05$  was considered to be a statistically significant difference. Each p-value was indicated in the results.

### **Collection of fecal samples from colitis model mice**

Female BALB/c mice were selected in dextran sulfate sodium (DSS)-induced colitis mode. A total of twenty 5-week-old female BALB/c mice (Japan SLC, Inc., Shizuoka, Japan) were housed in a clean rack maintained at  $23 \pm 3$  °C and  $50 \pm 20\%$  humidity and were allowed free access to standard solid feed and drinking water under a 12-h light/12-h dark cycle. Polycarbonate circular enrichment items for mice and paper-

based enrichment materials were placed in the clean rack, and four mice were housed per cage. The mice were divided into two experiments: the preliminary study for dose selection of DSS (molecular weight 36,000–50,000, MP Biomedicals, Santa Ana, CA, USA). In the present study, we used feces from mice from the preliminary study. During the 5-day acclimation period, pure water was provided in the preliminary study. After 1, 2, 3, and 4% DSS was administered to each mouse ( $n = 1$ ) via drinking water for 5 days, a 5-day recovery period was provided. Feces were collected on the fifth day after the start of the 4% DSS administration. When the animal caretaker restrained the mouse, defecation occurred; therefore, freshly excreted feces adhering around the anus were collected with tweezers, transferred to dedicated tubes, and stored at  $-70\text{ }^{\circ}\text{C}$ . We also collected feces from the control mouse ( $n = 1$ ). All animal experimental procedures were reviewed and approved by the Animal Experiment Committee of Tokyo University of Agriculture and Technology (Approval No.: R05-191). The study was conducted in compliance with the ARRIVE (Animal Research: Reporting of In Vivo Experiments) guidelines.

Supplementary Figures

**Human Hb**

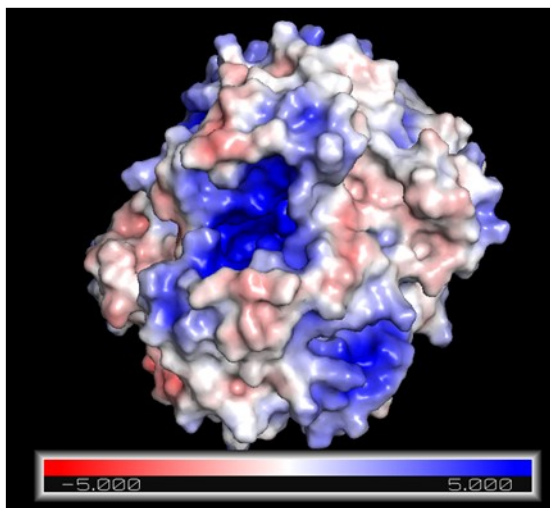

**PDB ID: 2HHB**

**(PyMOL)**

**Mouse Hb**

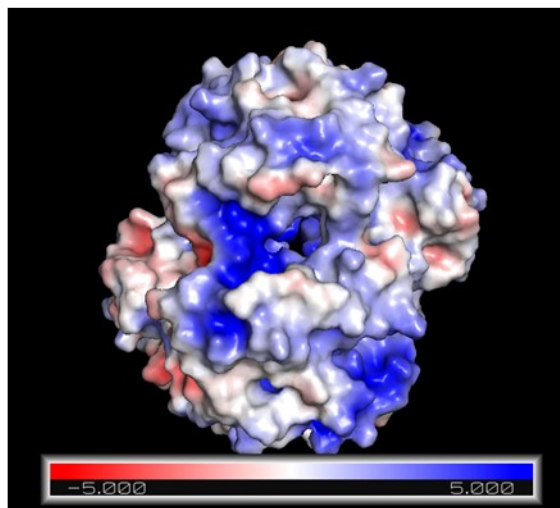

**PDB ID: 3HRW**

**Figure S1.** Results of charge calculation at pH 6.5 for human Hb and mouse Hb by PyMOL

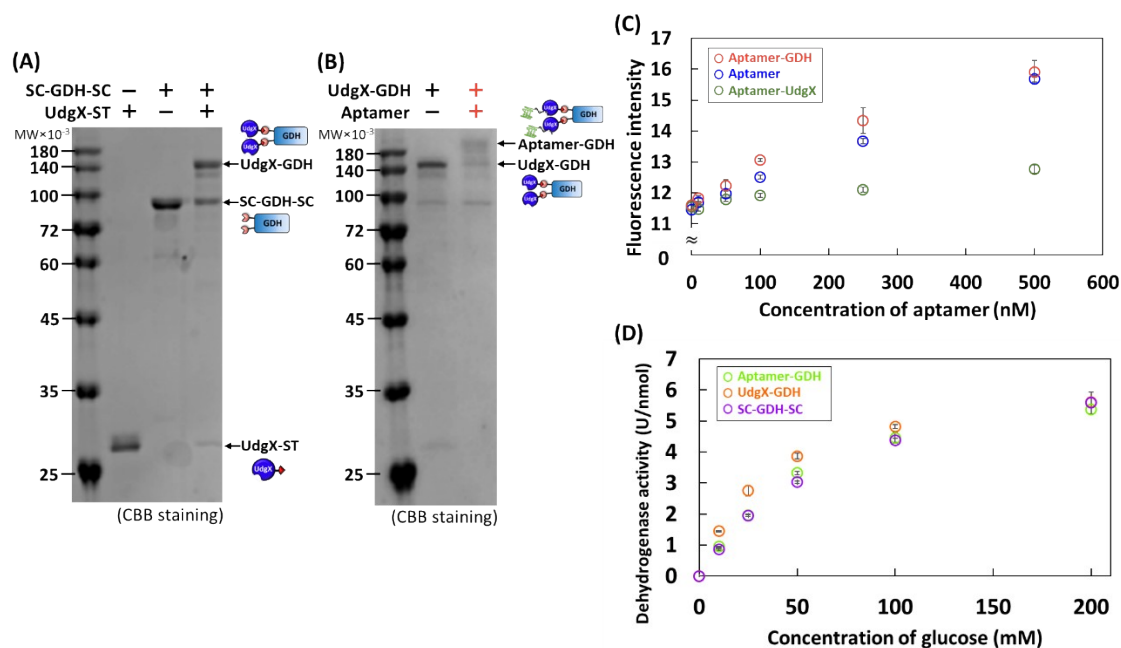

**Figure S2.** Preparation and functional evaluation of aptamer-GDH complex.

(A) The confirmation of the ST / SC reaction using 10  $\mu$ M UdgX-ST and 5  $\mu$ M SC-GDH-SC by SDS-PAGE stained with Coomassie brilliant blue (CBB). The incubation was performed at 4  $^{\circ}$ C for 24 h. (B) The Confirmation of the enzymatic DNA conjugation by UdgX using 2.5  $\mu$ M UdgX-GDH and 5  $\mu$ M DNA aptamer PEA3-01 with UdgX recognition sequence by SDS-PAGE stained with CBB. (C) Evaluation of binding ability of aptamer-GDH complex to mouse Hb ( $n = 3$ ) by Enzyme-linked Oligonucleotide Assay (ELONA). Results are expressed as the mean  $\pm$  SD ( $n = 3$ ). (D) Evaluation of enzymatic activity assay using phenazine methosulfate (PMS) and dichlorophenolindophenol (DCIP). Glucose was added to Aptamer-GDH, UdgX-GDH, SC-GDH-SC at a final concentration of 0-200 mM. Enzyme activities were calculated from the reduction of DCIP at 600 nm. Results are expressed as the mean  $\pm$  SD ( $n = 3$ ).

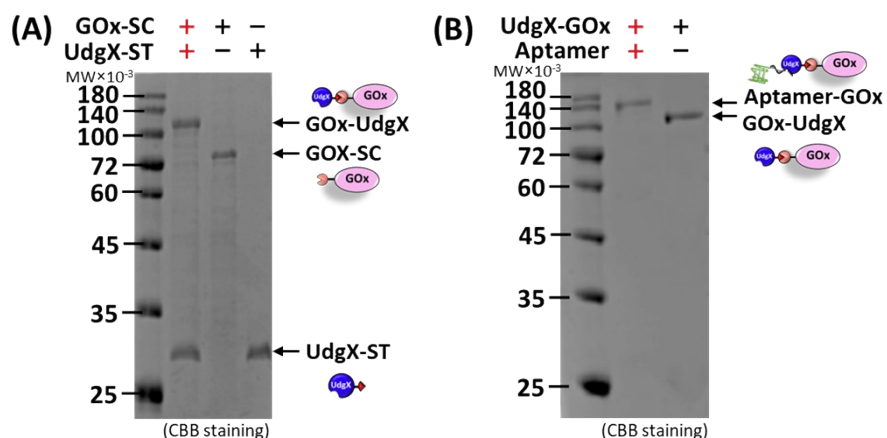

**Figure S3.** Preparation of Aptamer-GOx complex.

(A) The confirmation of the ST / SC reaction using 10  $\mu$ M UdgX-ST and 10  $\mu$ M GOx-SC by SDS-PAGE stained with Coomassie brilliant blue (CBB). The incubation was performed at 4  $^{\circ}$ C for 24 h. (B) The Confirmation of the enzymatic DNA conjugation by UdgX using 2.5  $\mu$ M UdgX-GOx and 5  $\mu$ M DNA aptamer PEA3-01 with UdgX recognition sequence by SDS-PAGE stained with CBB.

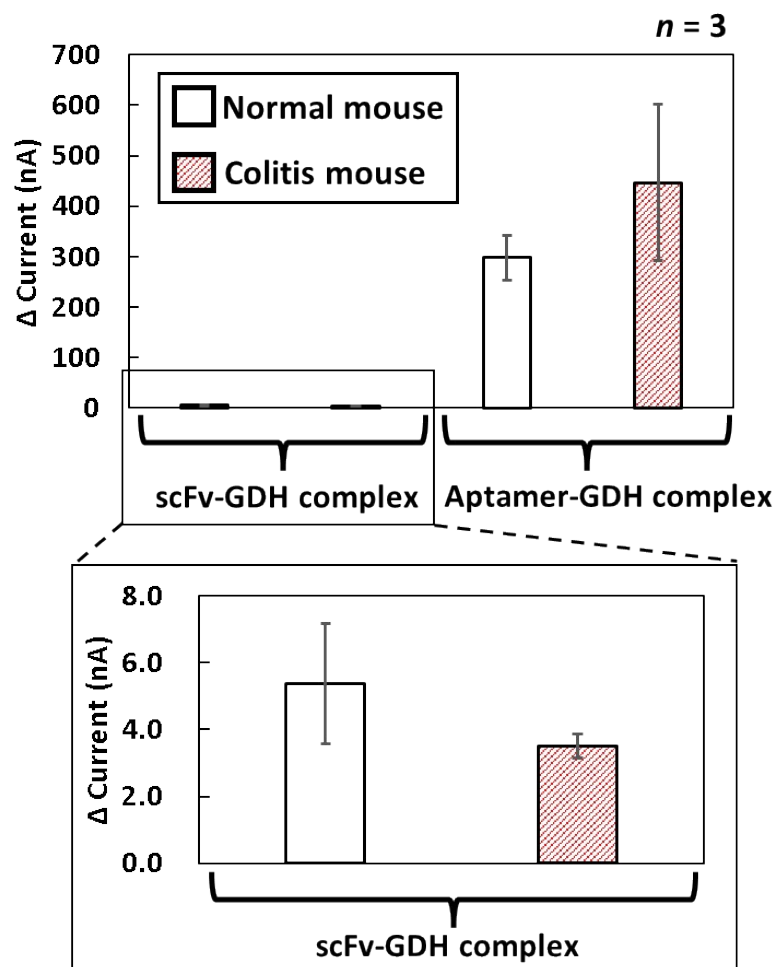

**Figure S4.** Comparison of electrochemical detection using human Hb-binding aptamers vs. anti-human Hb scFv

**Table S1. Oligonucleotide sequences used in this study.**

| Name             | Sequence (5' to 3')                                                                   |
|------------------|---------------------------------------------------------------------------------------|
| PEA3-01-SSU9     | <u>GGGCGGGTTGGGCTGGGTTTCTCAAGTGUAGGCATG</u><br>CAAGAGCTTTTTCTACATCTCAGCATTCT          |
| PEA3-01-SSU9-FAM | <u>GGGCGGGTTGGGCTGGGTTTCTCAAGTGUAGGCATG</u><br>CAAGAGCTTTTTCTACATCTCAGCATTCT<br>[FAM] |

FAM: fluorescent compound (FAM) with excitation and emission peaks at 495 and 520 nm, Underline: sequences of aptamer; SSU9: UdgX recognition sequence (single-stranded DNA), respectively

**Table S2. Protein sequences used in this study.**

| Sample    | Sequence (N term – C term)                                                                                                                                                                                                                                                                                                                                                                                                                                                                                                                                                                                                                                                                                                 |
|-----------|----------------------------------------------------------------------------------------------------------------------------------------------------------------------------------------------------------------------------------------------------------------------------------------------------------------------------------------------------------------------------------------------------------------------------------------------------------------------------------------------------------------------------------------------------------------------------------------------------------------------------------------------------------------------------------------------------------------------------|
| UdgX-ST   | MAGAQDFVPHTADLAELAAAAGECRGCGLYRDATQAVF<br>GAGGRSARIMMIGE QPGDKEDLAGLPFVGPAGRLLDRAL<br>EAADIDRDALYVTNAVVKHFKFTRAAGGKRRIHKTPSRTEV<br>VACRPWLIAEMTSVEPDVVLLGATAAKALLGNDFRVTQ<br>HRGEVLHVDDVPGDPALVATVHPSSLLRGPKEERESAFAG<br>LVDDLVAADVVRPGSGAHIVMVDAYKPTKKLAAALEHHH<br>HHH                                                                                                                                                                                                                                                                                                                                                                                                                                                    |
| SC-GDH-SC | MGSSHHHHHHSSGLVPRGSGAMVDTL SGLSSEQQQSGDM<br>TIEEDSATHIKFSKRDEDGKELAGATMELRDSSGKTISTWI<br>SDGQVKDFYLYPGKYTFVETAAPDGYEVATAITFTVNEQG<br>QVTVNGKATKGD AHIGSGHMNTTTYDYIVVGGGTSGLVV<br>ANRLSENPDVSVLLLEAGASVFNNPDVTNANGYGLAFGSAI<br>DWQYQSINQSYAGGKQQVLRAGKALGGTSTINGMAYTRA<br>EDVQIDVWQKLGNEGWTWKDLLPYL KSENLTAPTSSQV<br>AAGAAYNPACNGKEGPKVGVWSGLASGNLSVALNRTFQ<br>AAGVPWVEDVNCGKMRFNIYPSTLDVDLNVREDAARAY<br>YFPYDDRKNLHLENTTANRLF WKNGSAEEAIADGVEITS<br>ADGKVTRVHAKKEVIISAGALRSPLILELSGVGNPTILKKN<br>NITPRVDLPTVGENLQDQFNNGMAGEGYGVLAGASTVTY<br>PSISDVFGNETDSIVASLRSQLSDYAAATVKVSNGHMKQED<br>LERLYQLQFDLIVKDKVPIAEILFHPGGGNAVSEFWGLLP<br>FARGNIHSSNDPTAPAAINPNYFMFEWDGKSQAGIAKYIR<br>KILRSAPLNKLI AKETKPGLSEIPATAADEKWVEWLKANY |

|        |                                                                                                                                                                                                                                                                                                                                                                                                                                                                                                                                                                                                                                                                                                                                                                                                                                                   |
|--------|---------------------------------------------------------------------------------------------------------------------------------------------------------------------------------------------------------------------------------------------------------------------------------------------------------------------------------------------------------------------------------------------------------------------------------------------------------------------------------------------------------------------------------------------------------------------------------------------------------------------------------------------------------------------------------------------------------------------------------------------------------------------------------------------------------------------------------------------------|
|        | <b>RSNFHPVGTAAAMMPRSIGGVVDNRLRVYGTSNVRVVDAS<br/> VLPFQVCGHLVSTLYAVAERASDLIKEDAKSAGSGGAMVD<br/> TSLGLSSEQGQSGDMTIEEDSATHIKFSKRDEDGKELAGAT<br/> MELRDSSGKTISTWISDGQVKDFYLYPGKYTFVETAAPDG<br/> YEVATAITFTVNEQGQVTVNGKATKGDHILEHHHHHH</b>                                                                                                                                                                                                                                                                                                                                                                                                                                                                                                                                                                                                             |
| GOx-SC | <b>MNGIEASLLTDPKDVSGRTVDYIIAGGGTLGLTTAARLTE<br/> NPNISVLVIESGSYESDRGPHIEDLNAYGDIFGSSVDHAYETV<br/> ELATNNQTALIRSGNGLGGSTLVNGGTWTRPHKAQVDSW<br/> ETVFGNEGWNWDNVAAYSLQAERARAPNAKQIAAGHYFN<br/> ASCHGVNGTVHAGPRDTGDDYSPIVKALMSAVEDRGVPT<br/> KKDFGCGDPHGVSMPNTLHEDQVRSDAAREWLLPNYQR<br/> PNLQVLTGQYVGKVLSSQNGTTPRAVGVEFGTHKGNTHN<br/> VYAKHEVLLAAGSAVSPTILEYSGIGMKSILEPLGIDTVVD<br/> LPVGLNLQDQTTATVRSRITSAGAGQGQAAWFATFNETFG<br/> DYSEKAHELLNTKLEQWAEAEAVARGGFHNTTALLIQYEN<br/> YRDWIVNHNVAYSELFLDTAGVASFDVWDLFPFTRGYVHI<br/> LDKDPYLHHFAYDPQYFLNELDLLGQAAATQLARNISNSG<br/> AMQTYFAGETIPGDNLAYDADLSAWTEYIPYHFRPNYHGV<br/> GTCSMMPKEMGGVVDNAARVYGVQGLRVIDGSIPPTQMS<br/> SHVMTVFYAMALKISDAILEDYASMQGSGGAMVDTSLGLS<br/> SEQGQSGDMTIEEDSATHIKFSKRDEDGKELAGATMELRD<br/> SSGKTISTWISDGQVKDFYLYPGKYTFVETAAPDGYEVAT<br/> AITFTVNEQGQVTVNGKATKGDHIIHHHHHH</b> |

His: His-tag; ST: SpyTag; SC: SpyCatcher; GOx: glucose oxidase; GDH: glucose dehydrogenase, respectively

**Table S3. Comparison of the performance of electrochemical detection of Hb.**

|                         | Method                       | Linear range (nM)                          | Sample Target | Ref.                       |
|-------------------------|------------------------------|--------------------------------------------|---------------|----------------------------|
| Aptasensor              | Square Wave Voltammetry      | 0.8-560                                    | -             | (Teniou et al., 2023)      |
| scFv-enzyme complex     | Chrono-amperometry           | 10-3.0×10 <sup>2</sup>                     | serum         | (Miura et al., 2021)       |
| Aptasensor              | Difference Pulse Voltammetry | 1.0×10 <sup>-10</sup> -1.0×10 <sup>3</sup> | buffer        | (Shekari et al., 2017)     |
| Ferromagnetic Fe@C Nps  | Cyclic Voltammetry           | 1.0×10 <sup>-3</sup> -1.0×10 <sup>2</sup>  | blood         | (Matysiak et al., 2015)    |
| Pencil Lead Electrode   | Voltammetry                  | 1.5×10 <sup>2</sup> -2.0×10 <sup>3</sup>   | buffer        | (Majidi et al., 2011)      |
| Carbon nanotubes        | Flow Injection Analysis      | 5.0-2.0×10 <sup>3</sup>                    | -             | (Pakapongpan et al., 2011) |
| aptamer -enzyme complex | Chrono-amperometry           | 12.5-2.0×10 <sup>2</sup>                   | stool         | This study                 |

## References

1. N. Suzuki, J. Lee, N. Loew, Y. Takahashi-Inose, J. Okuda-Shimazaki, K. Kojima, K. Mori, W. Tsugawa, K. Sode, Engineered Glucose Oxidase Capable of Quasi-Direct Electron Transfer after a Quick-and-Easy Modification with a Mediator, *Int. J. Mol. Sci.*, 2020, **21**, 1137.
2. E. Komiya, S. Takamatsu, D. Miura, K. Tsukakoshi, W. Tsugawa, K. Sode, K. Ikebukuro, R. Asano, Exploration and Application of DNA-Binding Proteins to Make a Versatile DNA-Protein Covalent-Linking Patch (D-Pclip): The Case of a Biosensing Element. *J. Am. Chem. Soc.*, 2024, **146**, 4087–4097.
3. A. Teniou, A. Rhouati, S. Rabai, G. Catanante, J. L. Marty, Design of a label-free aptasensor for electrochemical determination of hemoglobin: investigation of the peroxidase-like activity of hemoglobin for the sensing of different substrates, *Analyst*, 2023, **148**, 3899-3908.

4. D. Miura, H. Kimura, W. Tsugawa, K. Ikebukuro, K. Sode, R. Asano, Rapid, convenient, and highly sensitive detection of human hemoglobin in serum using a high-affinity bivalent antibody–enzyme complex, *Talanta*, 2021, **234**, 122638.
5. Z. Shekari, H. R. Zare, and A. Falahati, An ultrasensitive aptasensor for hemin and hemoglobin based on signal amplification via electrocatalytic oxygen reduction, *Anal. Biochem.*, 2017, **518**, 102-109.
6. E. Matysiak, M. Donten, A. Kowalczyk, M. Bystrzejewski, I. P. Grudzinski, A. M. Nowicka, A novel type of electrochemical sensor based on ferromagnetic carbon-encapsulated iron nanoparticles for direct determination of hemoglobin in blood samples, 2015, **64**, 554-559.
7. M. R. Majidi, A. Saadatirad, E. Alipour, Voltammetric determination of hemoglobin using a pencil lead electrode, *Electroanal.*, 2011, **23**, 1984-1990.
8. S. Pakapongpan, R. Palangsuntikul, and W. Surareungchai, Electrochemical sensors for hemoglobin and myoglobin detection based on methylene blue-multiwalled carbon nanotubes nanohybrid-modified glassy carbon electrode, *Electrochim. Acta*, 2011, **56**, 6831-6836.
